# Supplementary material for: Catalytic deoxygenation of stearic acid into olefins over Pt catalysts supported on MOF-derived metal oxides
Source: Royal Society of Chemistry journal article supplement (doi:10.1039/d4cy00189c), 2024-01-01
Supplement: d4cy00189c1.pdf [file d4cy00189c1.pdf]

## ***Supporting Information***

---

### **Catalytic Deoxygenation of Stearic Acid into Olefins over Pt Catalysts Supported on MOF-derived Metal Oxides**

*Kok Bing Tan,<sup>a,c‡</sup> Yiping Liu,<sup>a,c‡</sup> Youting Wang,<sup>a,c</sup> Sajid Ali,<sup>a,c</sup> Wendong Wang,<sup>a,c</sup> Jingru Li,<sup>a</sup> Longmei Shang,<sup>a,c\*</sup> Xing Yan,<sup>a</sup> Xiaodong Zhang,<sup>b,\*</sup> and Guowu Zhan<sup>a,c\*</sup>*

*<sup>a</sup> Academy of Advanced Carbon Conversion Technology, College of Chemical Engineering, Integrated Nanocatalysts Institute (INCI), Huaqiao University, 668 Jimei Avenue, Xiamen, Fujian, 361021, P. R. China*

*<sup>b</sup> College of Marine Equipment and Mechanical Engineering, Jimei University, 185 Yinjiang Road, Xiamen, 361021, Fujian, China*

*<sup>c</sup> Fujian Provincial Key Laboratory of Biomass Low-Carbon Conversion, Huaqiao University, 668 Jimei Avenue, Xiamen, Fujian, 361021, P. R. China*

*\*Corresponding author email: gwzhan@hqu.edu.cn (G. Zhan), shanglm@hqu.edu.cn (L. Shang) and xd\_zhang77@aliyun.com (X. Zhang)*

*‡ These two authors contributed equally to this work.*

Number of pages: 9

Number of figures: 6

Number of tables: 1

## Supplementary Figures

|                                                                                                                                                                                                                                                                         |   |
|-------------------------------------------------------------------------------------------------------------------------------------------------------------------------------------------------------------------------------------------------------------------------|---|
| <b>Figure S1.</b> N <sub>2</sub> physisorption isotherms of (a) ZrO <sub>2</sub> , Pt/ZrO <sub>2</sub> , and (b) Fe <sub>2</sub> O <sub>3</sub> samples.....                                                                                                            | 3 |
| <b>Figure S2.</b> Thermogravimetric analysis (TGA) for UIO-66, Ce-BTC, and MIL-88B(Fe) metal-organic framework. ....                                                                                                                                                    | 4 |
| <b>Figure S3.</b> TEM image of (a) Pt/CeO <sub>2</sub> , and (b) Pt/ZrO <sub>2</sub> . Inset of (a, b) show the histogram of the particle size distribution of Pt nanoparticles.....                                                                                    | 5 |
| <b>Figure S4.</b> XPS data for Pt/ZrO <sub>2</sub> in different regions: (a) Zr 3 <i>d</i> and (b) Pt 4 <i>f</i> . ....                                                                                                                                                 | 6 |
| <b>Figure S5.</b> XPS data for Pt/Fe <sub>2</sub> O <sub>3</sub> in different regions: (a) Fe 2 <i>p</i> , (b) Fe 3 <i>p</i> , and (c) Pt 4 <i>f</i> . ....                                                                                                             | 7 |
| <b>Figure S6.</b> (a) TEM images of Pt/CeO <sub>2</sub> before reaction, (b-c) EDX elemental maps of Pt/CeO <sub>2</sub> before reaction, (d) TEM images of Pt/CeO <sub>2</sub> after reaction, and (e-f) EDX elemental maps of Pt/CeO <sub>2</sub> after reaction..... | 8 |

## Supplementary Table

|                                                                                                          |    |
|----------------------------------------------------------------------------------------------------------|----|
| <b>Table S1.</b> BET-specific surface area, pore diameter, and Pt loading amount of various samples..... | S9 |
|----------------------------------------------------------------------------------------------------------|----|

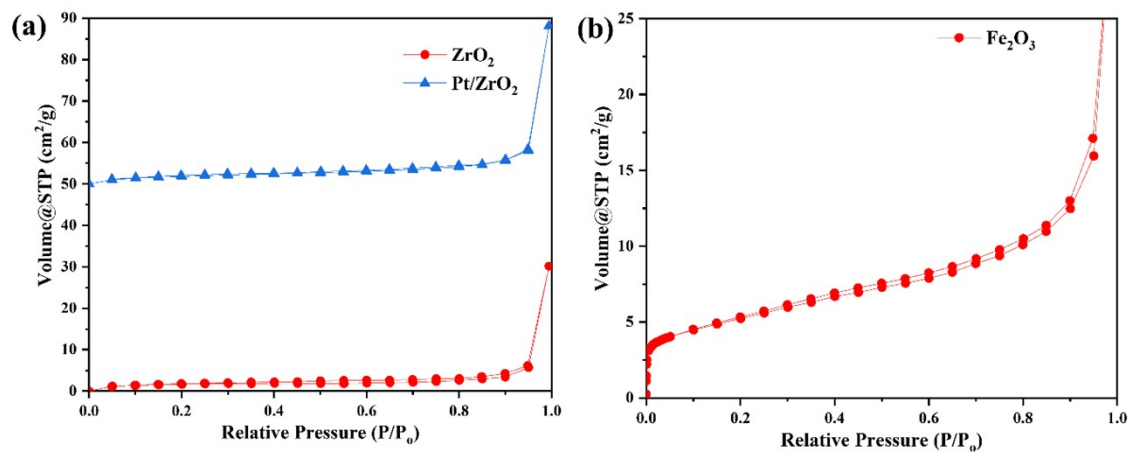

**Figure S1.** N<sub>2</sub> physisorption isotherms of (a) ZrO<sub>2</sub>, Pt/ZrO<sub>2</sub>, and (b) Fe<sub>2</sub>O<sub>3</sub> samples.

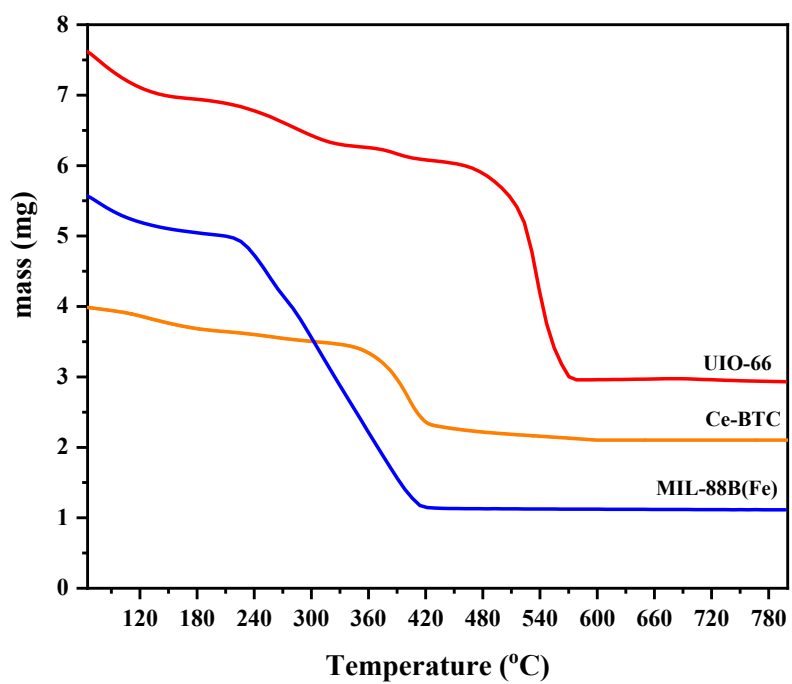

**Figure S2.** Thermogravimetric analysis (TGA) for UIO-66, Ce-BTC, and MIL-88B(Fe) metal-organic framework.

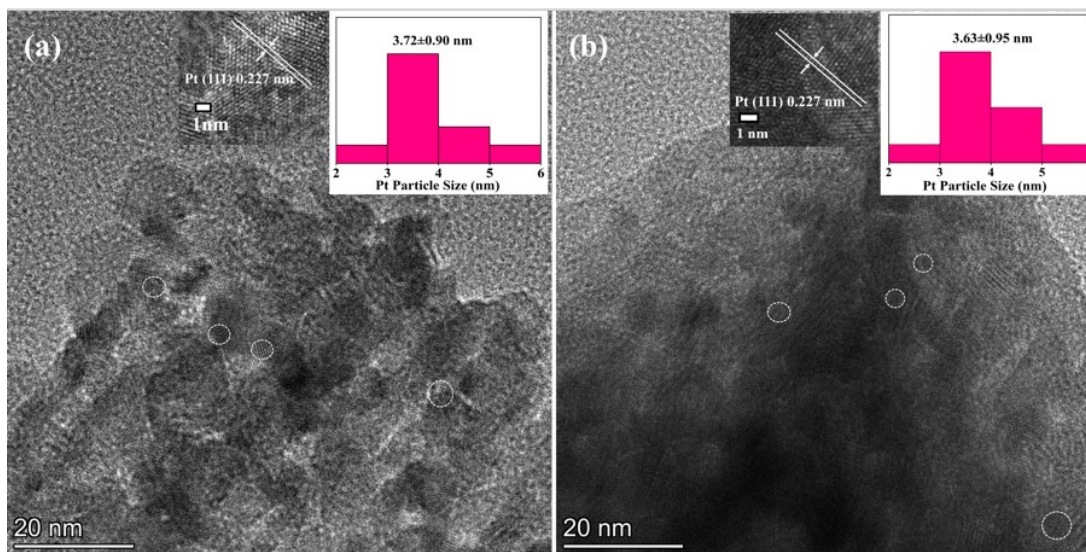

**Figure S3.** TEM image of (a) Pt/CeO<sub>2</sub>, and (b) Pt/ZrO<sub>2</sub>. Inset of (a, b) show the histogram of the particle size distribution of Pt nanoparticles

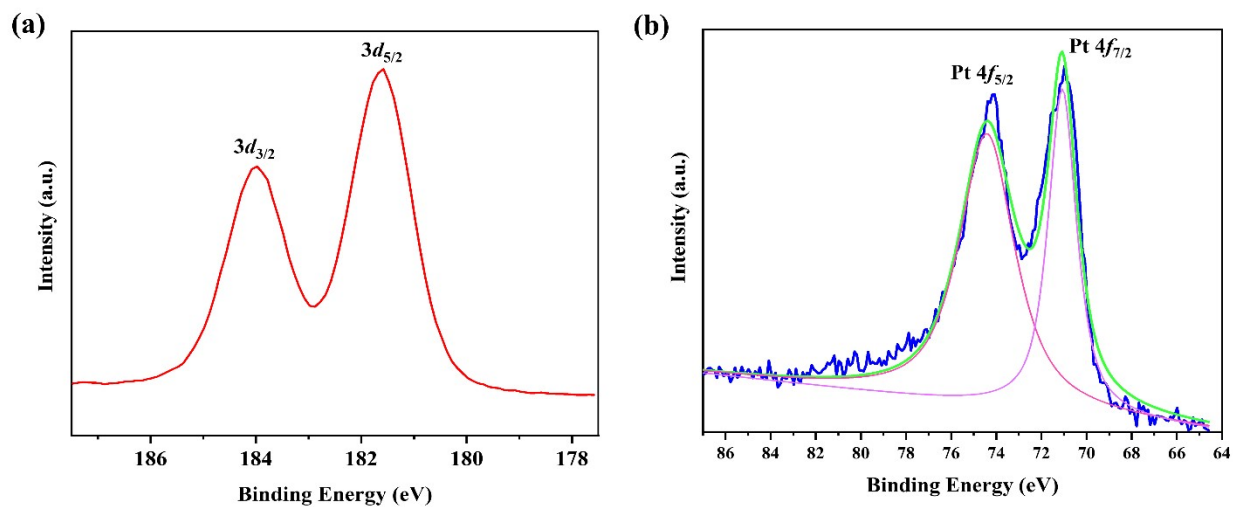

**Figure S4.** XPS data for Pt/ZrO<sub>2</sub> in different regions: (a) Zr 3d and (b) Pt 4f.

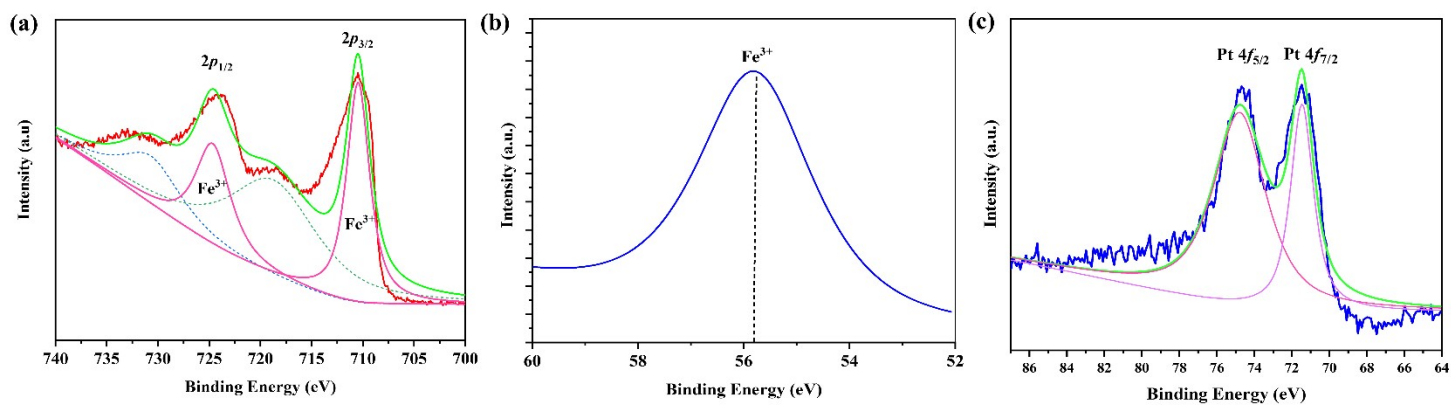

**Figure S5.** XPS data for Pt/Fe<sub>2</sub>O<sub>3</sub> in different regions: (a) Fe 2p, (b) Fe 3p, and (c) Pt 4f.

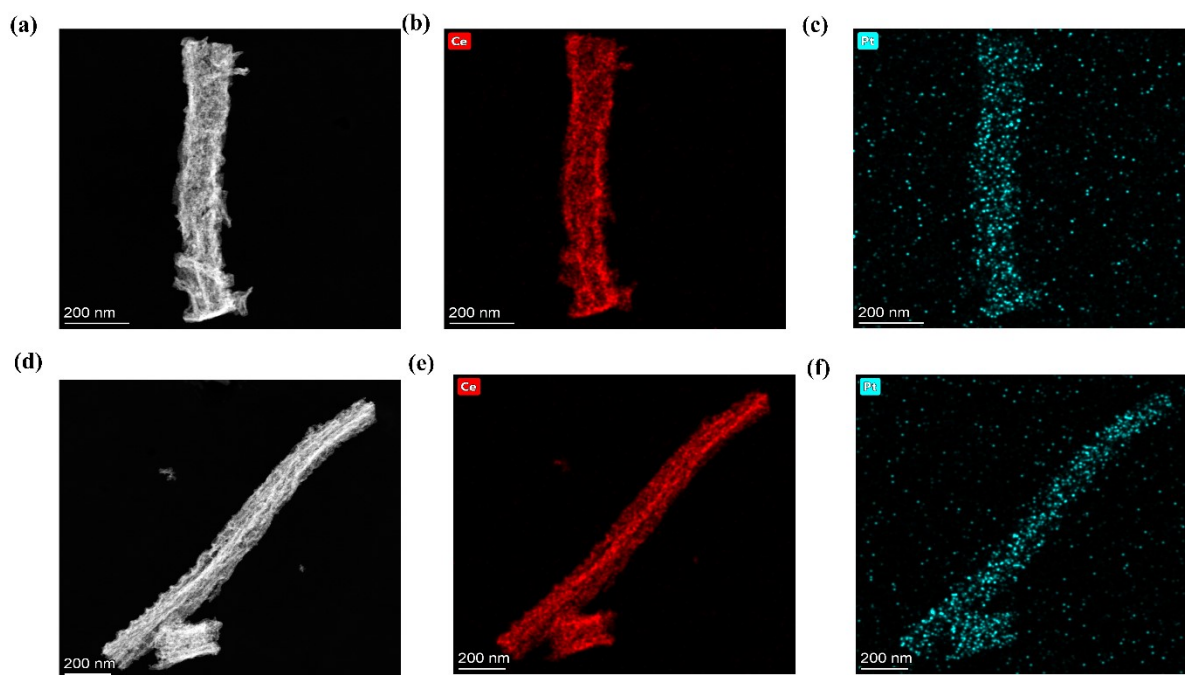

**Figure S6.** (a) TEM images of Pt/CeO<sub>2</sub> before reaction, (b-c) EDX elemental maps of Pt/CeO<sub>2</sub> before reaction, (d) TEM images of Pt/CeO<sub>2</sub> after reaction, and (e-f) EDX elemental maps of Pt/CeO<sub>2</sub> after reaction.



**Table S1.** BET-specific surface area, pore diameter, and Pt loading amount of various samples.

| Sample                            | BET Surface area (m <sup>2</sup> /g) | Pore diameter (nm) | pore volume (cm <sup>3</sup> /g) | Pt wt% <sup>a</sup> |
|-----------------------------------|--------------------------------------|--------------------|----------------------------------|---------------------|
| Ce-BTC                            | 21.1                                 | 4.5                | 0.09                             | -                   |
| CeO <sub>2</sub>                  | 59.5                                 | 6.54               | 0.19                             | -                   |
| Pt/CeO <sub>2</sub>               | 53                                   | 3.41               | 0.15                             | 3.2                 |
| UIO-66                            | 1456                                 | 0.78               | 0.58                             | -                   |
| ZrO <sub>2</sub>                  | 6.1                                  | 4.9                | 0.05                             | -                   |
| Pt/ZrO <sub>2</sub>               | 7.1                                  | 3.82               | 0.06                             | 1.4                 |
| MIL-88(B) Fe                      | 42.7                                 | 4.6                | 0.17                             | -                   |
| Fe <sub>2</sub> O <sub>3</sub>    | 18.6                                 | 3.46               | 0.04                             | -                   |
| Pt/Fe <sub>2</sub> O <sub>3</sub> | 25                                   | 3.06               | 0.22                             | 2.6                 |

Note: <sup>a</sup> detected based on ICP- OES.
